# Supplementary material for: A thin disc-shaped macrocapsule for transplantation of oxygen carrier-laden alginate hydrogel-encapsulated pancreatic islets in diabetic mice
Source: Royal Society of Chemistry journal article supplement (doi:10.1039/d4ma00211c), 2024-01-01
Supplement: d4ma00211c1.pdf [file d4ma00211c1.pdf]

## Supplementary

### A Thin Disc-Shaped Macrocapsule for Transplantation of Oxygen Carriers- Laden Alginate Hydrogel- Encapsulated Pancreatic islets in Diabetic Mice

A)

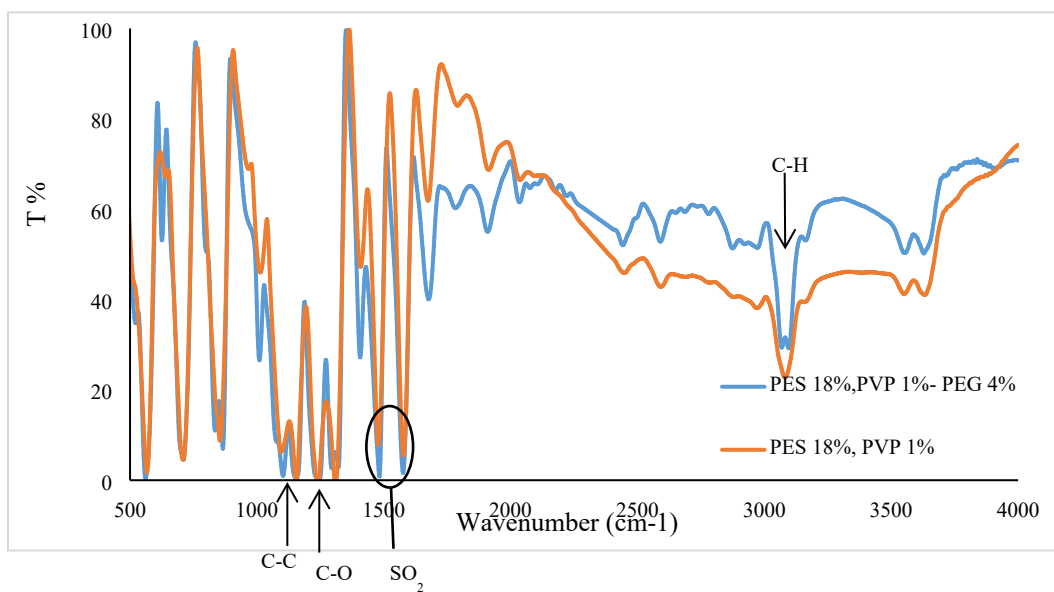

B)

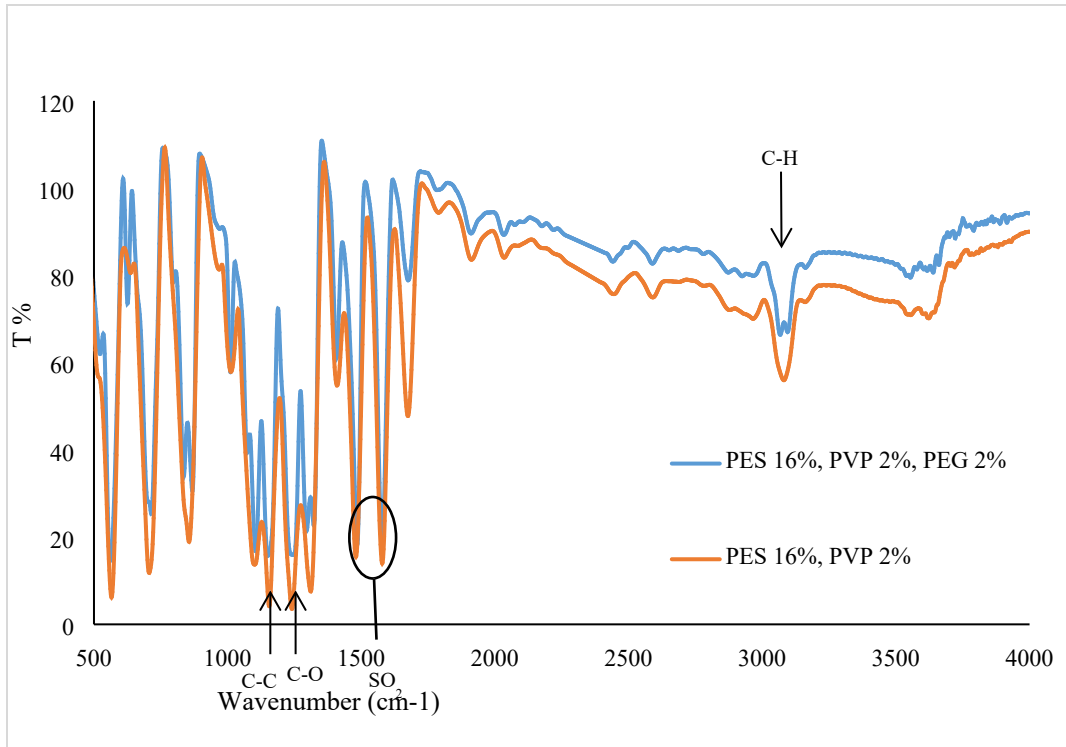

**S1: FT-IR Spectra of M1, M2, M3 and M4:** Chemical identification of PES thin membranes before and after modification with the FT-IR spectroscopy were performed in the range of wavenumber 600- 4000  $\text{cm}^{-1}$  a) Comparison of FT-IR spectra of M1( PES 18%, PVP 1%) and M2 (PES 18%, PVP 1%, PEG 4%) thin membrane, which show common functional groups in both spectra b) Comparison of FT-IR spectra of M3 (PES 16%, PVP 2%) and M4 (PES 16%, PVP 2%, PEG 2%) thin membrane, which show common functional groups in both spectra

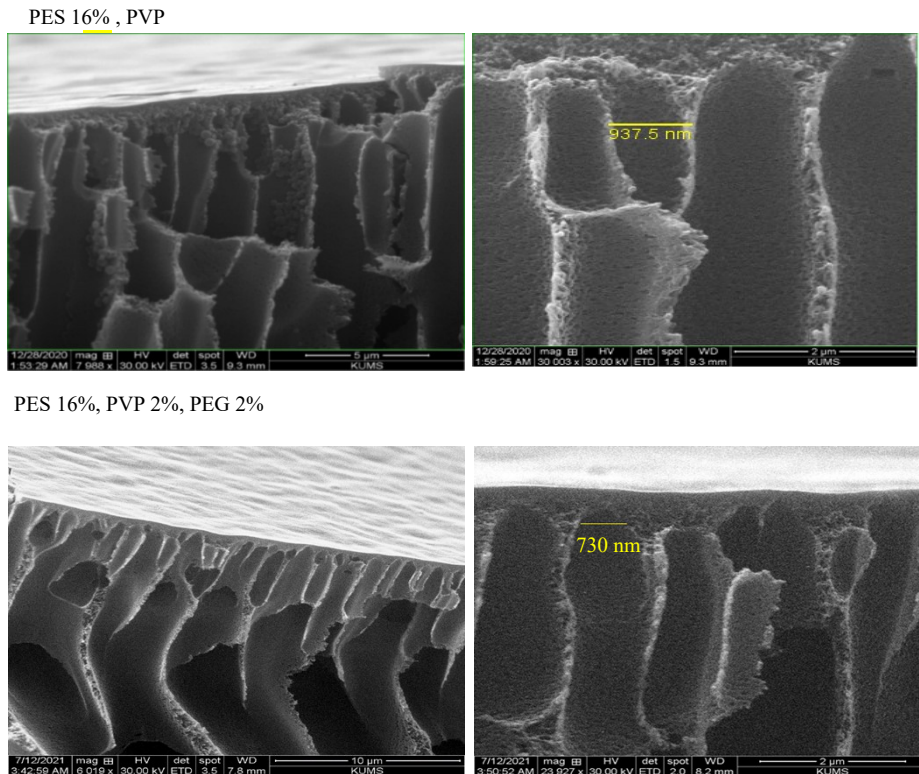

**S2: Scanning Electron Microscopy of M3 and M4:** The morphological changes of the prepared M3 and M4 thin membranes were observed by scanning electron microscopy. To improve the resolution of the cross-sectional image, thin-membranes were immersed in liquid nitrogen for 1 minute at room temperature and then broken. Cross-sectional and surface of members coated with a thin layer of gold/palladium to minimize electrical charge.

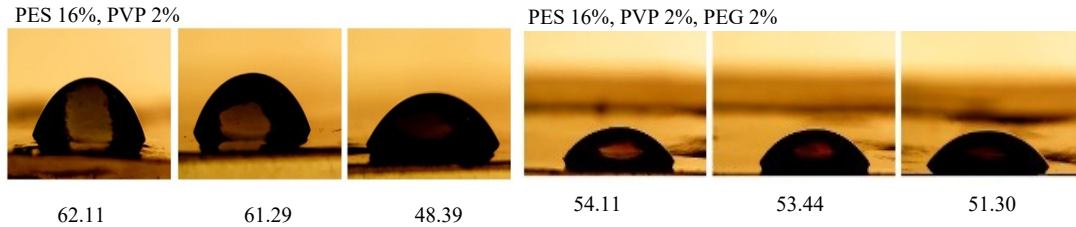

**S3: Comparison of the Contact Angles of M3 and M4 Thin Membranes.** The hydrophilicity properties of modified and unmodified thin membranes are determined by measuring the contact angle between the surface of the thin-membrane and the water drop (5- 25  $\mu$ L) using the sessile drop method. The contact angle is reduced in M4 thin membrane.

#### S4. Mechanical properties of M1, M2, M3 and M4 membranes

| Membrane               | Tensile stress at break (MPa) | Elongation at break (%) |
|------------------------|-------------------------------|-------------------------|
| PES 16%, PVP 2%        | 2.47                          | 3.97                    |
| PES 16%, PVP2%, PEG 2% | 1.86                          | 2.86                    |
| PES 18%, PVP1%         | 4.48                          | 13.5                    |
| PES 18%,PVP 1%, PEG 4% | 2.72                          | 4.55                    |

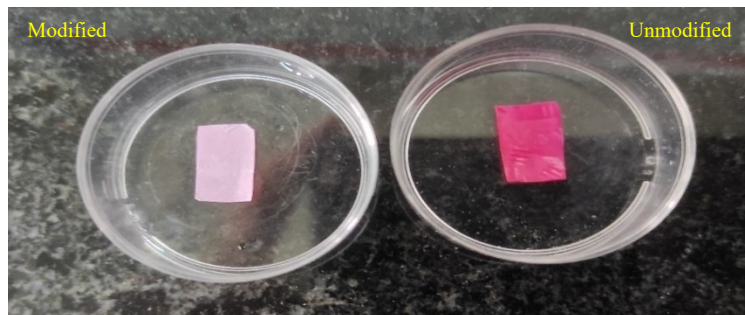

**S5. Evaluation of Protein Absorption on the Macrocapsule Surface:** M1 and M2 thin membranes were examined by the Ponceau S staining method in order to study their protein absorption properties. A thin membrane with dimensions of 0.5cm $\times$ 0.5cm was immersed in protein solution containing serum albumin (BSA) with a concentration of 10 mg/mL for 1 hour and then immersed in 2% SDS solution in a shaker incubator for 30 min. In the following,

drops of Ponceau S 5% stained solution were poured on the thin membrane and, after 1 min, washed three times with distilled water. The color difference was observed in both M1 and M2 thin membranes.

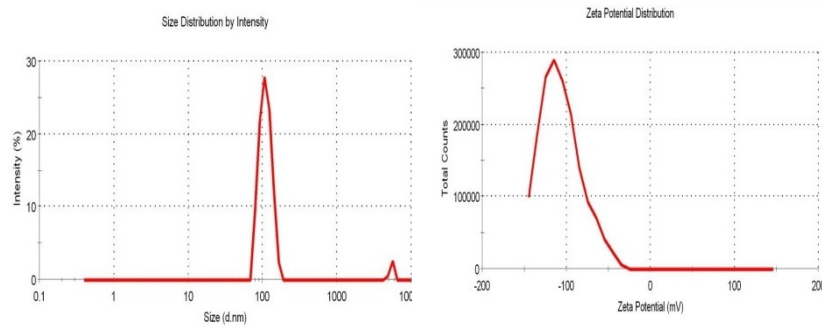

**S6 .Dynamic Light Scattering (DLS):** The hydrodynamic diameters, zeta potentials, and polydispersity of PFOB emulsion were determined by dynamic light scattering (DLS). For preparation, PFOB emulsion was sonicated for 30 minutes with a probe sonicator (Hielscher, UP 100 H).
